# Supplementary material
Source: PubMed Central journal article supplement (PMC3961092)
Supplement: tjp0592-1353-sd1.pdf [file tjp0592-1353-sd1.pdf]

A

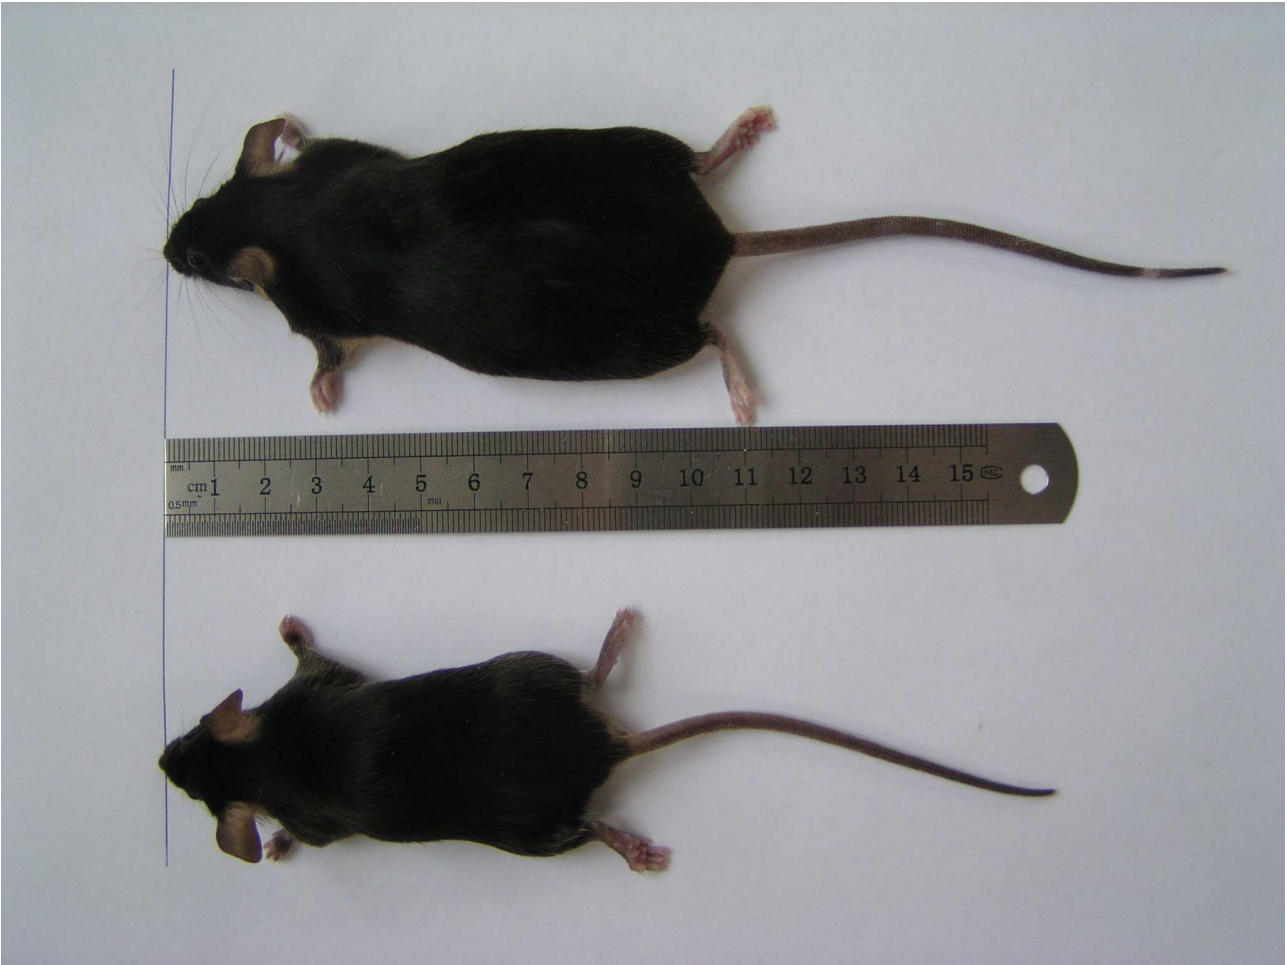

B

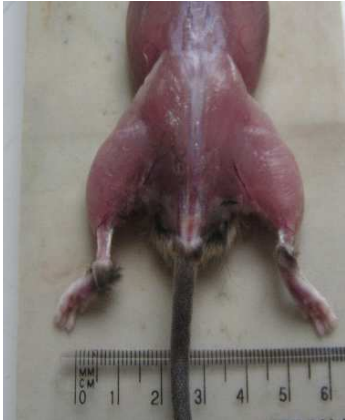

C

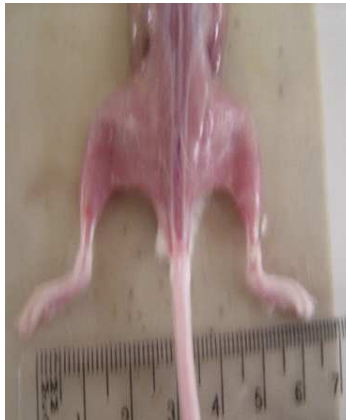

### SP1. Fenotyping of the mice

*Cmp<sup>+</sup>* mice (A panel top, B) are significantly larger than their control (A panel bottom, C) counterparts. 25 week old mice.

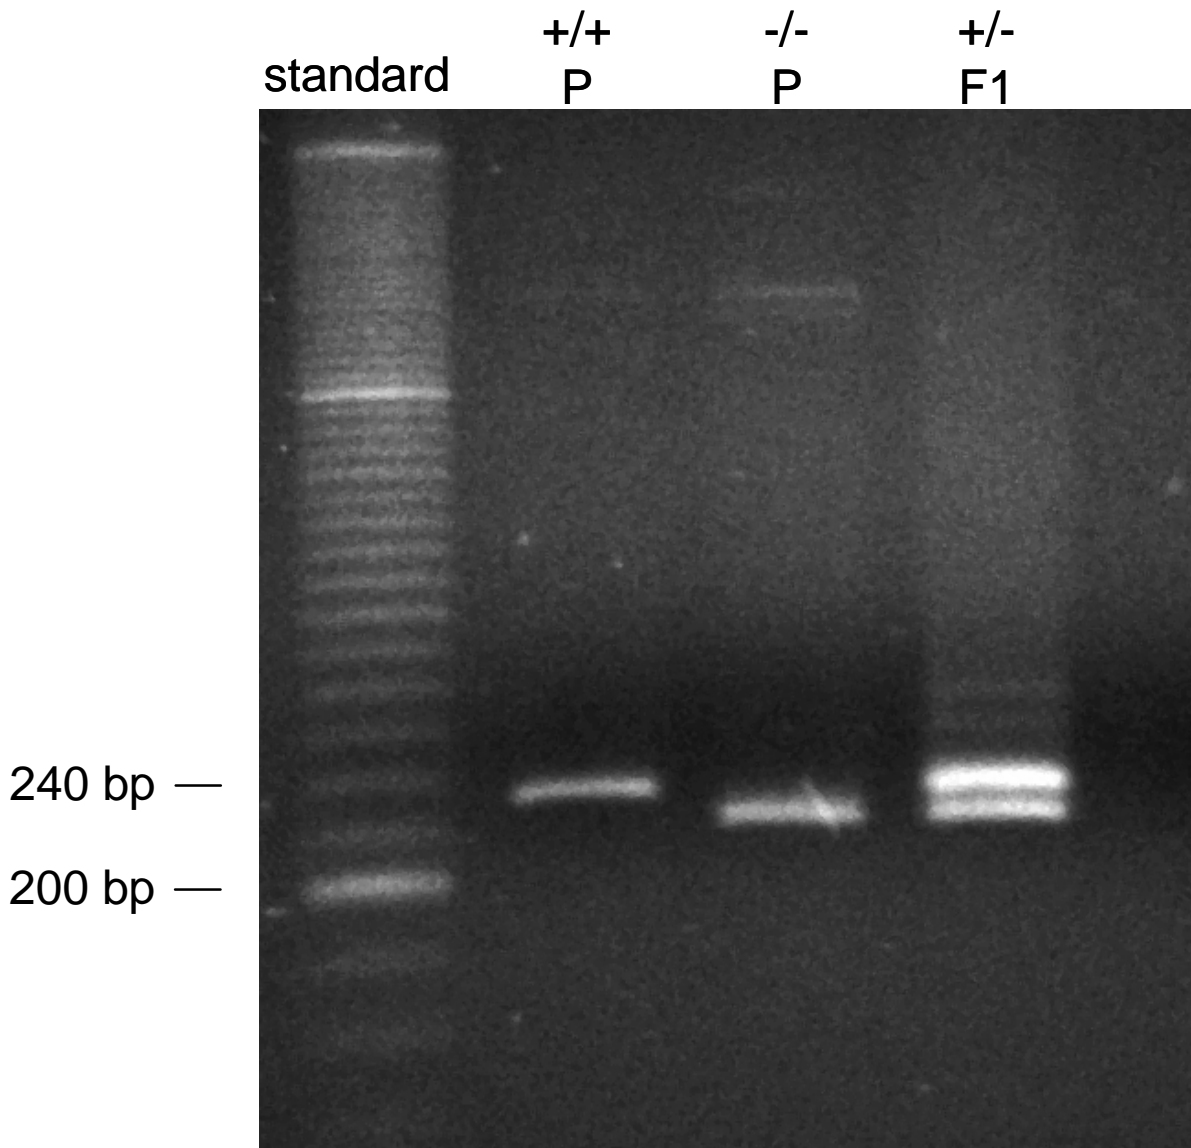

### SP2. Genotyping of the mice

RT-PCR analysis of myostatin composition in different tail segments from a control C57/Bl6 (+/+, Lane 2), a *Cmpt* (-/-, Lane 3) and a heterozygote (+/-, Lane 4) mouse. Lane 1: standard. (P: parents; F1: first generation)

### *Extension to Materials and methods*

#### *RT-PCR procedure*

The 12-bp deletion in the myostatin gene of the *Cmpt* mouse was detected with RT-PCR according to the genebank sequence for myostatin accession number: NM 010834. The following primer pairs were used: myostatin forward 5' ACTGGAATCCGATCTCTGAACTT 3' and myostatin reverse 5' GACCTCTTGGGTGTGTCTGTAC 3'. These primers amplified a 233 bp and a 221 bp fragment, as expected. PCR products were analysed on 2.5% agarose gel.

The mixture (20 µL) for reverse transcriptase (RT) reactions contained 500 ng total RNA, 0.25 µL RNase inhibitor, 0.25 µL oligo dT primer, 1 µL dNTP Mix (200 µM), Omniscript™ RT (1 µL) in 10× RT buffer (High Capacity RT kit; Qiagen) and complementary cDNA was transcribed at 37 °C for 1 hours. PCR reactions were carried out in a final volume of 50 µL containing 2–2 µL forward and reverse primers (10 µM), 1 µL cDNA, 1 µL dNTP Mix (200

$\mu\text{M}$ ), and Promega GoTaq<sup>®</sup> DNA polymerase (0.5  $\mu\text{L}$ ) in 5x GoTaq<sup>®</sup> Reaction Buffer in a programmable thermal cycler (C 1000 Gradient Thermal Cycler; BioRad) with the following settings: 2 min at 95 °C for initial denaturation followed by 35 repeated cycles of denaturation at 94 °C for 1 min, primer annealing for 1 min at an optimised temperature (58 °C), and extension at 72 °C for 90 s. After the final cycle, further extension was allowed to proceed for another 10 min at 72 °C.

#### *Whole-cell intracellular $\text{Ca}^{2+}$ concentration measurement*

Fibres were equilibrated in Tyrode's solution for 30 minutes at room temperature. Cover slips with Fura-2 loaded fibres were placed on the stage of an inverted fluorescence microscope (Diaphot, Nikon, Tokyo, Japan). The excitation wavelength was altered between 340 and 380 nm by a microcomputer-controlled dual-wavelength monochromator (Deltascan, Photon Technology International, New Brunswick, NJ), whereas the emission was monitored at 510 nm using a photomultiplier at 10 Hz acquisition rate of the ratios at 22°C. Fibres were permanently washed with Tyrode's solution using a background perfusion system, whilst the depolarizing solution (120 mM NaCl was replaced by 120 mM KCl) was applied through a local perfusion system, which was positioned in close proximity of the measured fibre.

#### *Detection of calcium release events*

After enzymatical dissociation, FDB fibres were placed into culture dishes with relaxing solution (in mM, 150 K-glutamate, 2  $\text{MgCl}_2$ , 10 HEPES and 1 EGTA). The fibres were permeabilized using 0.01% saponin for a few seconds. Fibres were monitored persistently during the permeabilization. Spontaneous calcium release events were visualised by 50  $\mu\text{M}$  Fluo-3 using a confocal laser scanning microscope (Zeiss 5 META, Oberkochen, Germany) at 22 °C. Line-scan images (512 pixels/line) were used to monitor the fluorescence intensity changes at 1.53 ms/line scanning speed and using a 63x water immersion objective. Fluo-3 was excited with an argon ion laser at 488 nm.

#### *$\text{Ca}^{2+}$ sensitivity of the contractile proteins*

After enzymatical isolation, permeabilization was performed with 0.5 % Triton-X 100 detergent. The pCa of the relaxing solution (in mM, 37.34 KCl, 10 BES, 6.24  $\text{MgCl}_2$ , 7 EGTA, 6.99  $\text{Na}_2\text{ATP}$ , and 15 sodium creatinin-phosphate, pH 7.2) was 9, while the fully activating solution (relaxing solution supplemented with 7 mM Ca) had a pCa of 4.75. Fibres were attached to two thin needles: one of them was connected to a force transducer and the other one to a electromagnetic motor. Isometric force measurements were performed during repeated activation–relaxation cycles at a sarcomere length (SL) of 2.3  $\mu\text{m}$  at 15°C.
